# Supplementary material for: In Situ Polycondensation Synthesis of NiS-g-C3N4 Nanocomposites for Catalytic Hydrogen Generation from NaBH4
Source: MDPI journal article supplement (doi:10.3390/nano13050938), 2023-03-05
Supplement: s1 [file s1]

*Supplementary Materials*

# In Situ Polycondensation Synthesis of NiS-g-C<sub>3</sub>N<sub>4</sub> Nanocomposites for Catalytic Hydrogen Generation from NaBH<sub>4</sub>

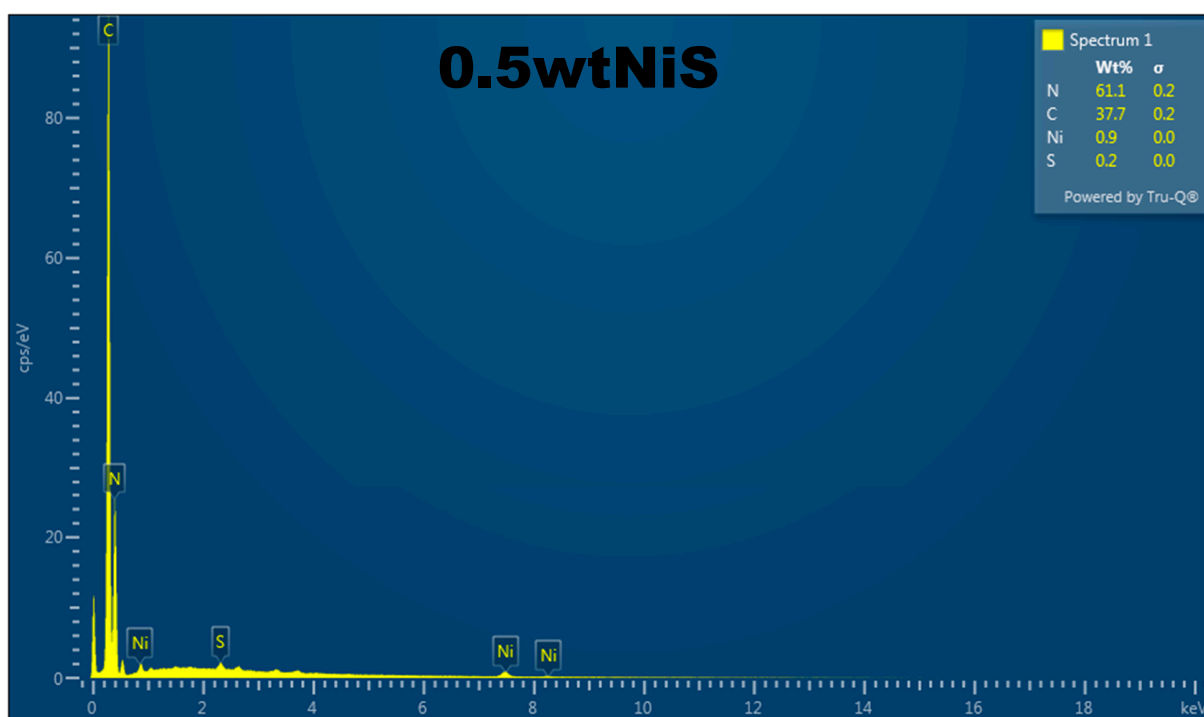

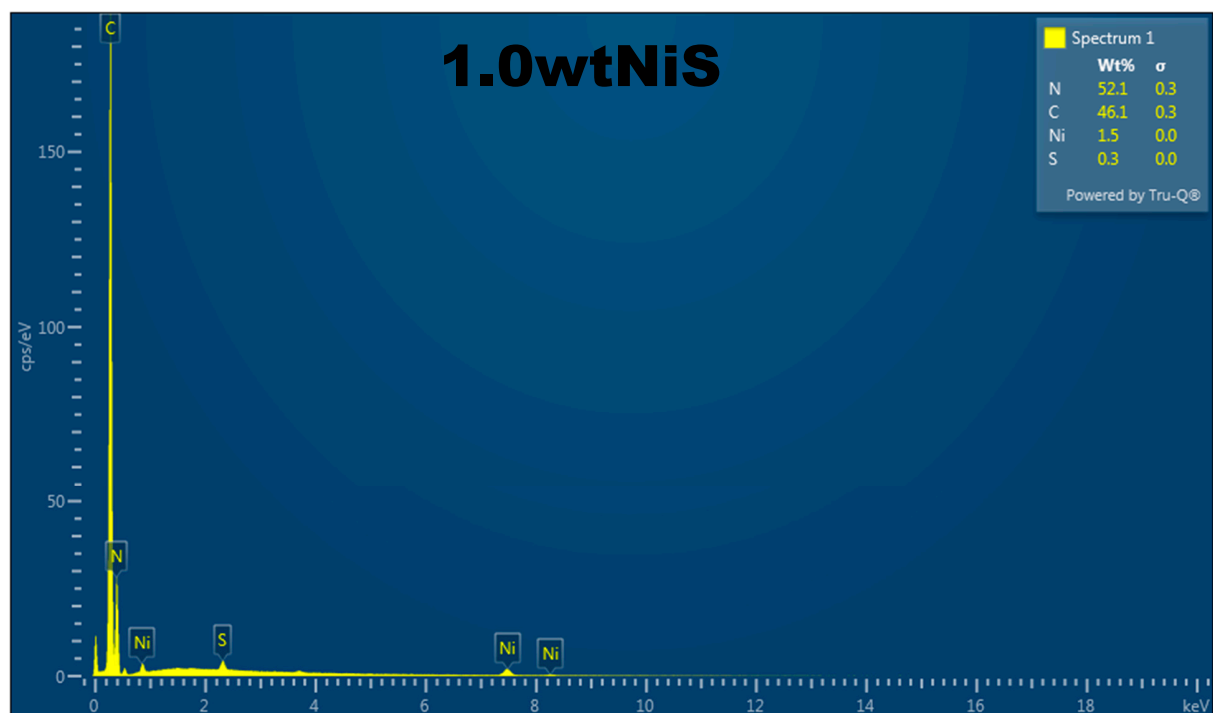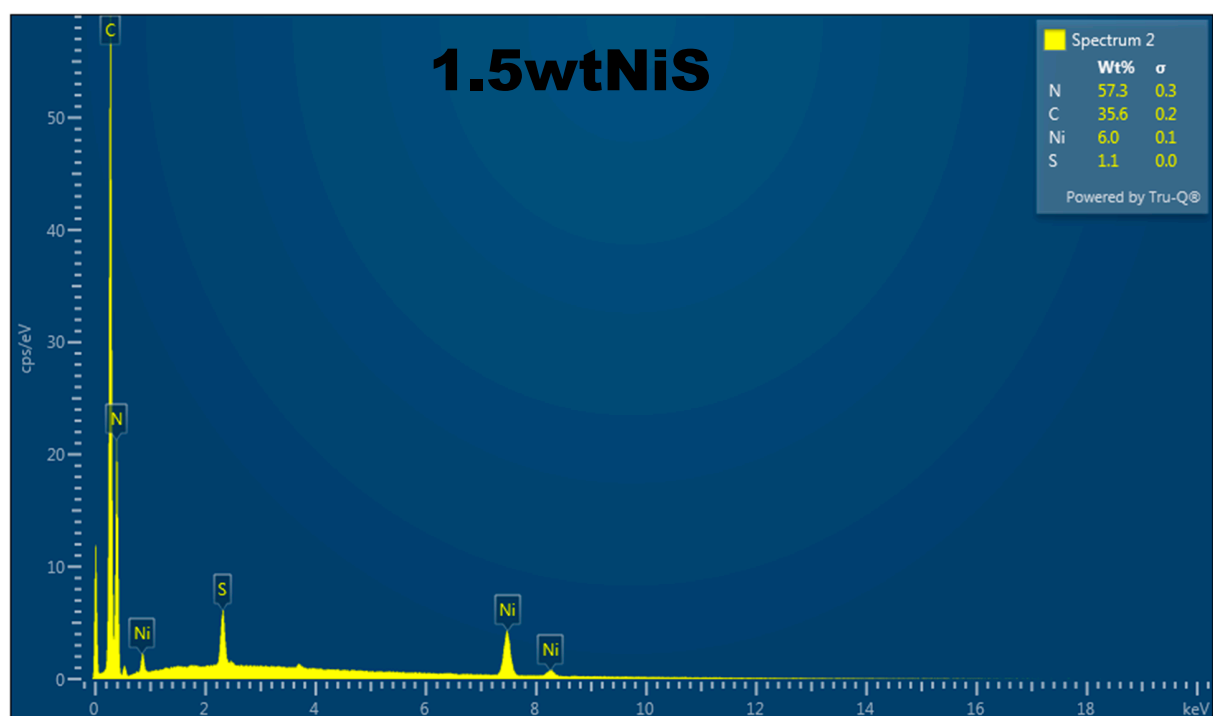

**Figure S1.** EDX data for NiS-g-C<sub>3</sub>N<sub>4</sub> nanocomposites
